# Supplementary material
Source: PubMed Central journal article supplement (PMC153615)

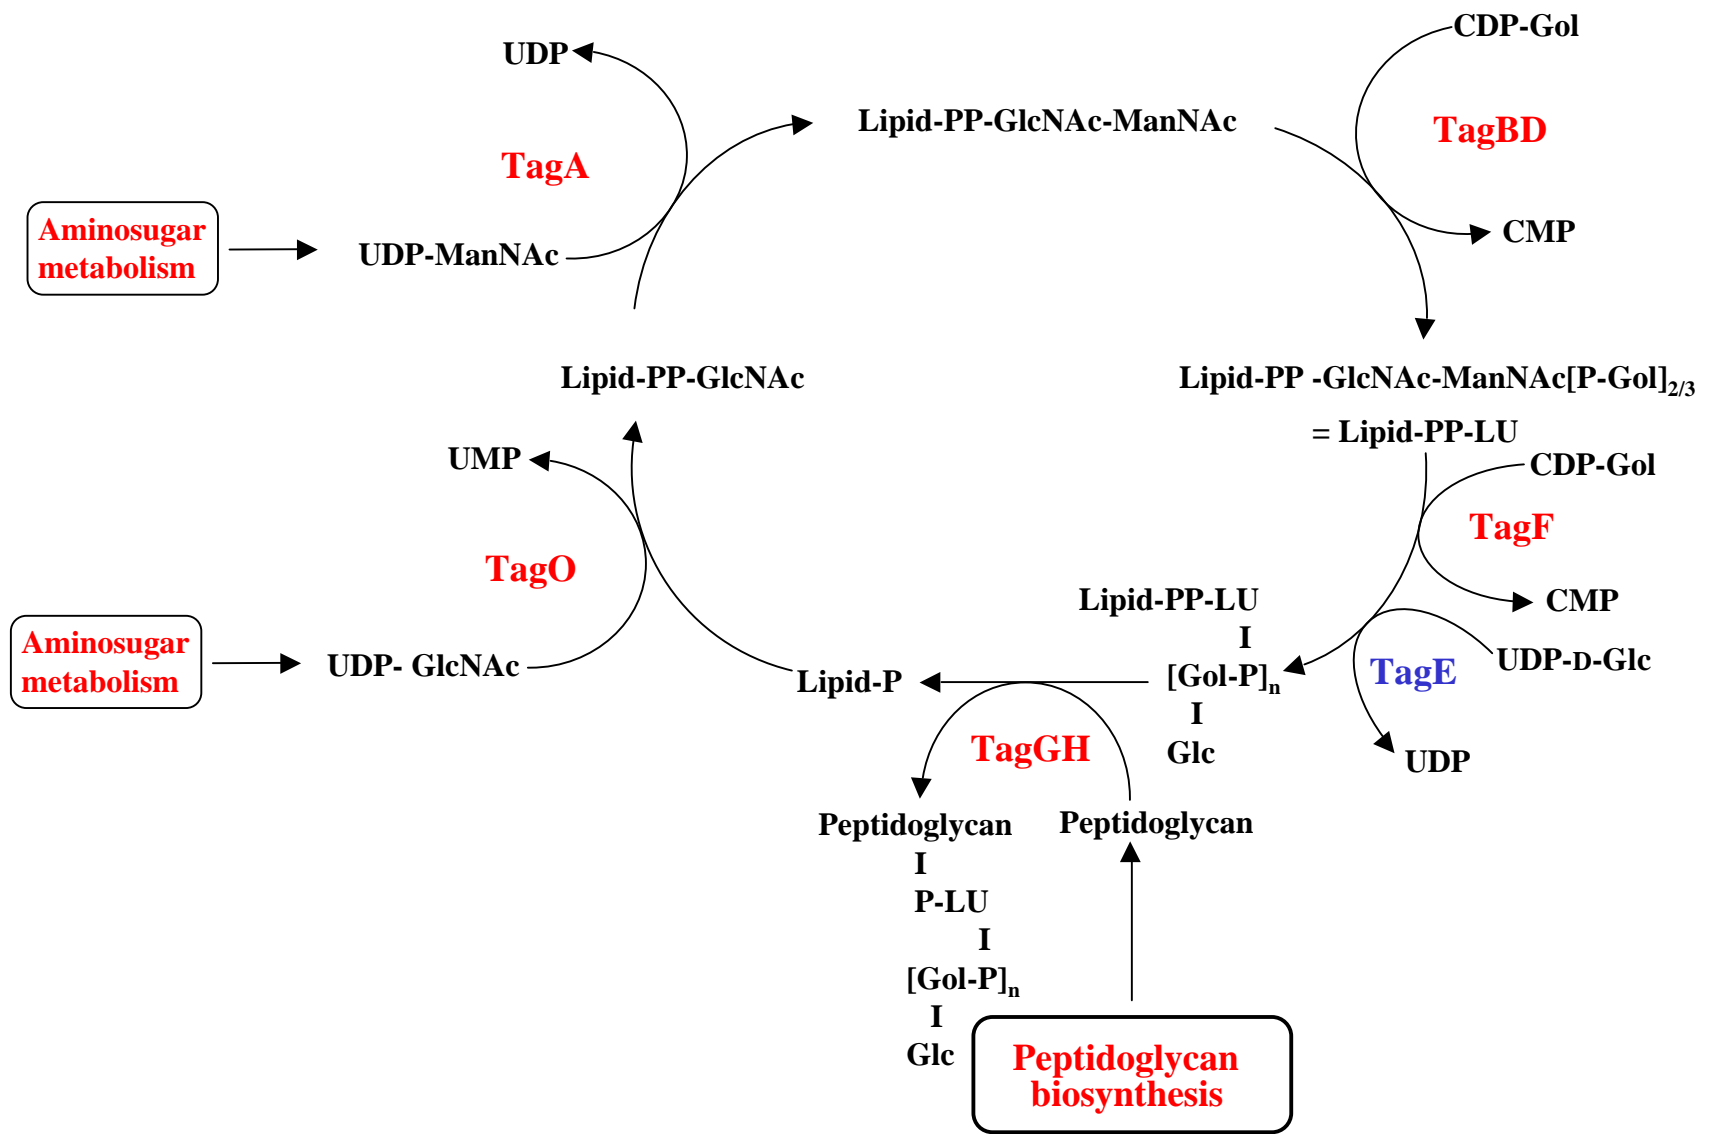

Supplement: pnas_0730515100_22.pdf [file pnas_0730515100_22.pdf]
